# Supplementary material
Source: publisher figshare collection journal article supplement (https://karger.figshare.com/ndownloader/files/22067598)
Supplement: Supplementary file 1 [file 22067598]

# Online Supplement File 1:

# Details concerning newborn examination

As examinations during the first year of life of the subject were collected both in the maternal and in the main questionnaire we proceeded as following:

As subjects would typically be unable to report procedures early in life, we considered exposures in the first year of life only if it was “confirmed” by the parents: that is, reported both in the maternal and main questionnaires, or reported only in the maternal questionnaire, or reported only in the main questionnaire when the interview was conducted with parents.

In total we excluded 6 examinations that were not “confirmed” by parents (Last row of the table below).

| **Questionnaire of origin** | **Coincidence between maternal and main questionnaire** | **Interviewee** | **count** | **Final decision (kept: YES/NO)** |
| --- | --- | --- | --- | --- |
| main | Complete: also reported in the maternal questionnaire | Participant toghether with parent(s) | 15 | YES |
| main | Only in Main* | Participant toghether with parent(s) | 16 | YES |
| maternal | Only in maternal questionnaire | No matter the identity of the interviewee | 31 | YES |
| main | Only in Main | Participant alone | 6 | NO |

*Only in Main can also be due to missing of the maternal questionnaire
